# Supplementary material
Source: PubMed Central journal article supplement (PMC3568564)
Supplement: AEM.02917-12_zam999104061so1.pdf [file AEM.02917-12_zam999104061so1.pdf]

## Supplementary Data

**Table S1.** Relative risks of *Candidatus Neoehrlichia mikurensis* infection in rodents of different species, China.

| Species                       | No. tested | No. (%) positive | Relative risk   | <i>P</i> value |
|-------------------------------|------------|------------------|-----------------|----------------|
| <i>Apodemus agrarius</i>      | 117        | 14 (12.0)        | 4.93            | <0.001         |
| <i>Apodemus sylvaticus</i>    | 40         | 5 (12.5)         | 3.45            | 0.019          |
| <i>Apodemus chevrieri</i>     | 49         | 0                | ND*             |                |
| <i>Apodemus draco</i>         | 7          | 1 (14.3)         | NS <sup>#</sup> |                |
| <i>Apodemus peninsulae</i>    | 57         | 5 (8.8)          | NS              |                |
| <i>Eothenomys miletus</i>     | 22         | 0                | ND              |                |
| <i>Eothenomys custos</i>      | 8          | 2 (25.0)         | 6.51            | 0.038          |
| <i>Microtus clarkei</i>       | 17         | 0                | ND              |                |
| <i>Microtus maximowiczii</i>  | 18         | 0                | ND              |                |
| <i>Mus musculus</i>           | 63         | 0                | ND              |                |
| <i>Mus pahari</i>             | 9          | 0                | ND              |                |
| <i>Myodes rufocanus</i>       | 83         | 4 (4.8)          | NS              |                |
| <i>Myodes rutilus</i>         | 19         | 0                | ND              |                |
| <i>Niviventer confucianus</i> | 52         | 1 (1.9)          | NS              |                |
| <i>Niviventer fulvescens</i>  | 16         | 0                | ND              |                |
| <i>Niviventer coxingi</i>     | 6          | 0                | ND              |                |
| <i>Rattus norvegicus</i>      | 87         | 1 (1.1)          | NS              |                |
| <i>Rattus flavipectus</i>     | 27         | 0                | ND              |                |
| <i>Rattus losea</i>           | 68         | 0                | ND              |                |
| <i>Meriones unguiculatus</i>  | 20         | 0                | ND              |                |
| <i>Tamias sibiricus</i>       | 7          | 1 (14.3)         | NS              |                |
| <i>Tscherskia triton</i>      | 49         | 0                | ND              |                |
| Total                         | 841        | 34 (4.0)         |                 |                |

Relative risk was calculated by comparing proportions positive for each rodent species compared with that for all other rodents, using Chi-square test or Fisher's exact test.

\*ND, relative risk is <1 but is not defined due to the zero value in any one of the cells in Chi-square test or Fisher's exact test

**Table S2.** Detailed information of the 34 sequenced samples.

| Region       | Rodent species                | No.<br>positive | GenBank accession number  |                           |
|--------------|-------------------------------|-----------------|---------------------------|---------------------------|
|              |                               |                 | <i>groEL</i>              | <i>rrs</i>                |
| Jilin        | <i>Apodemus peninsulae</i>    | 3               | JQ359072*                 | JQ359055*                 |
|              | <i>Apodemus agrarius</i>      | 11              | JQ359073*                 | JQ359056*                 |
|              | <i>Myodes rufocanus</i>       | 1               | JQ359074*                 | JQ359057*                 |
|              | <i>Tamias sibiricu</i>        | 1               | JQ359075*                 | JQ359058*                 |
| Heilongjiang | <i>Apodemus agrarius</i>      | 2               | KC108716*                 | KC108714*                 |
|              | <i>Apodemus peninsulae</i>    | 2               | KC108717*                 | KC108715*                 |
|              | <i>Myodes rufocanus</i>       | 2               | identical to<br>JQ359069# | identical to<br>JQ359052# |
| IMAR         | <i>Myodes rufocanus</i>       | 1               | JQ359076*                 | JQ359059*                 |
| Henan        | <i>Apodemus agrarius</i>      | 1               | JQ359064*                 | JQ359047*                 |
|              | <i>Rattus norvegicus</i>      | 1               | JQ359065*                 | JQ359048*                 |
| Fujian       | <i>Niviventer confucianus</i> | 1               | JQ359063*                 | JQ359046*                 |
| Zhejiang     | <i>Apodemus sylvaticus</i>    | 5               | JQ359066*                 | JQ359049*                 |
| Yunnan       | <i>Eothenomys custos</i>      | 2               | JQ359067*                 | JQ359050*                 |
|              | <i>Apodemus draco</i>         | 1               | JQ359068*                 | JQ359051*                 |

\*GenBank accession number determined in the present study.

#GenBank accession number determined in our previous study (1).

## Reference

1. **Li H, Jiang JF, Liu W, Zheng YC, Huo QB, Tang K, Zuo SY, Liu K, Jiang BG, Yang H, Cao WC.** 2012. Human infection with *Candidatus Neoehrlichia mikurensis*, China. *Emerg. Infect. Dis.* **18**:1636-1639.
